# Supplementary material
Source: Royal Society of Chemistry journal article supplement (doi:10.1039/d6fo02422j)
Supplement: d6fo02422j1.pdf [file d6fo02422j1.pdf]

Supplementary files

Table S1. The primer sequences for qRT-PCR

| Gene name          | Forward (5'-3')         | Reverse (5'-3')       |
|--------------------|-------------------------|-----------------------|
| <i>β-actin</i>     | CTGCTATGTTGCTCTAGACTTCG | ATGCCACAGGATTCCATACC  |
| <i>Bax</i>         | CTGATGGCAACTTCAACTG     | ATCTTCTTCCAGATGGTGAG  |
| <i>Bcl2</i>        | TGGATGACTGAGTACCTGAACC  | ATCAAACAGAGGTTCGCATGC |
| <i>Caspase3</i>    | GCTGACTTCCTGTATGCTTA    | GTTGCCACCTTCCTGTAA    |
| <i>Gnrh</i>        | CATTCTACTGCTGACTGTGT    | CCTGGCTTCCTCTTCAATC   |
| <i>Mapk1 (ERK)</i> | CCAGCATT CAGAAGTCAGA    | GGATACAGAGGCAAGAAGG   |
| <i>Hsd17b1</i>     | CTGTGTTGGATGTGAATGTG    | CTTCGTGGAATGGCAGTC    |
| <i>Hsd17b2</i>     | CCTGCTTCCTTCTTCTGTAT    | TATCTGCTCTGGCTTGGT    |
| <i>FSHR</i>        | TATGGCCCTCCTCGTACTCA    | AAATTGGGGCCATGCAGAGA  |
| <i>Star</i>        | TCCTCGCTACGTTCAAGCTG    | ACGTCGAACTTGACCCATCC  |
| <i>Esr1</i>        | TGCTCCTAACTTGCTCCT      | GATGTGGTCCTTCTCTCC    |
| <i>Esr2</i>        | CAACCTCCTGATGCTTCTT     | TGCTCTTACTGTCCTCTGT   |
| <i>Cyp19a1</i>     | CTGAACATCGGAAGAATGC     | TCACCTGGAATCGTCTCA    |

Table S2. Raw counts of estrous-stage distribution and cycle-pattern classification during the 10-day vaginal smear monitoring period

Table S2A. Group-level estrous-stage counts and percentages

| Group     | Mice for smear, n | Total observations | Proestrus, n (%) | Estrus, n (%) | Metestrus, n (%) | Diestrus, n (%) | Regular cycle, n (%) | Prolonged cycle, n (%) | Irregular cycle, n (%) | Disrupted cycle*, n (%) |
|-----------|-------------------|--------------------|------------------|---------------|------------------|-----------------|----------------------|------------------------|------------------------|-------------------------|
| Control   | 6                 | 60                 | 14 (23.33%)      | 18 (30.00%)   | 8 (13.33%)       | 20 (33.33%)     | 4 (66.67%)           | 1 (16.67%)             | 1 (16.67%)             | 2 (33.33%)              |
| CTX model | 6                 | 60                 | 22 (36.67%)      | 18 (30.00%)   | 2 (3.33%)        | 18 (30.00%)     | 0 (0.00%)            | 5 (83.33%)             | 1 (16.67%)             | 6 (100.00%)             |
| CoQ10     | 6                 | 60                 | 22 (36.67%)      | 13 (21.67%)   | 9 (15.00%)       | 16 (26.67%)     | 1 (16.67%)           | 3 (50.00%)             | 2 (33.33%)             | 5 (83.33%)              |
| SPH       | 6                 | 60                 | 15 (25.00%)      | 21 (35.00%)   | 11 (18.33%)      | 13 (21.67%)     | 2 (33.33%)           | 3 (50.00%)             | 1 (16.67%)             | 4 (66.67%)              |

\*Disrupted cycle includes prolonged and irregular cycles during the 10-day monitoring period.

Table S2B. Individual mouse-level estrous-stage counts and cycle-pattern classification

| Group     | Proestrus | Estrus | Metestrus | Diestrus | Total observations | Cycle pattern |
|-----------|-----------|--------|-----------|----------|--------------------|---------------|
| Control   | 2         | 4      | 2         | 2        | 10                 | Prolonged     |
| Control   | 2         | 3      | 2         | 3        | 10                 | Regular       |
| Control   | 2         | 2      | 1         | 5        | 10                 | Regular       |
| Control   | 4         | 3      | 1         | 2        | 10                 | Irregular     |
| Control   | 2         | 3      | 1         | 4        | 10                 | Regular       |
| Control   | 2         | 3      | 1         | 4        | 10                 | Regular       |
| CTX model | 3         | 4      | 0         | 3        | 10                 | Prolonged     |
| CTX model | 4         | 3      | 0         | 3        | 10                 | Irregular     |
| CTX model | 4         | 3      | 1         | 2        | 10                 | Prolonged     |
| CTX model | 4         | 2      | 1         | 3        | 10                 | Prolonged     |
| CTX model | 3         | 4      | 0         | 3        | 10                 | Prolonged     |
| CTX model | 4         | 2      | 0         | 4        | 10                 | Prolonged     |
| CoQ10     | 3         | 3      | 0         | 4        | 10                 | Prolonged     |
| CoQ10     | 3         | 3      | 2         | 2        | 10                 | Regular       |
| CoQ10     | 5         | 1      | 2         | 2        | 10                 | Prolonged     |
| CoQ10     | 2         | 2      | 4         | 2        | 10                 | Irregular     |
| CoQ10     | 5         | 1      | 1         | 3        | 10                 | Irregular     |
| CoQ10     | 4         | 3      | 0         | 3        | 10                 | Prolonged     |
| SPH       | 3         | 2      | 2         | 3        | 10                 | Prolonged     |
| SPH       | 3         | 2      | 2         | 3        | 10                 | Regular       |
| SPH       | 2         | 4      | 2         | 2        | 10                 | Irregular     |
| SPH       | 2         | 4      | 1         | 3        | 10                 | Prolonged     |
| SPH       | 2         | 5      | 2         | 1        | 10                 | Prolonged     |
| SPH       | 3         | 4      | 2         | 1        | 10                 | Regular       |

Table S3. Raw follicle-count data from ovarian histological sections

Table S3A. Raw follicle counts in each counted replicate

| Group     | Mature follicles | Atretic follicles | Primordial follicles |
|-----------|------------------|-------------------|----------------------|
| Control   | 4                | 0                 | 2                    |
| Control   | 0                | 0                 | 10                   |
| Control   | 2                | 1                 | 4                    |
| CTX model | 3                | 5                 | 6                    |
| CTX model | 0                | 2                 | 5                    |
| CTX model | 0                | 1                 | 6                    |
| CoQ10     | 0                | 0                 | 2                    |
| CoQ10     | 0                | 5                 | 10                   |
| CoQ10     | 2                | 2                 | 4                    |
| SPH       | 2                | 0                 | 4                    |
| SPH       | 0                | 6                 | 5                    |
| SPH       | 0                | 1                 | 10                   |

Table S3B. Summary of follicle-count data

| Group     | Mature follicles | Atretic follicles | Primordial follicles |
|-----------|------------------|-------------------|----------------------|
| Control   | 2.00 ± 2.00      | 0.33 ± 0.58       | 5.33 ± 4.16          |
| CTX model | 1.00 ± 1.73      | 2.67 ± 2.08       | 5.67 ± 0.58          |
| CoQ10     | 0.67 ± 1.15      | 2.33 ± 2.52       | 5.33 ± 4.16          |
| SPH       | 0.67 ± 1.15      | 2.33 ± 3.21       | 6.33 ± 3.21          |

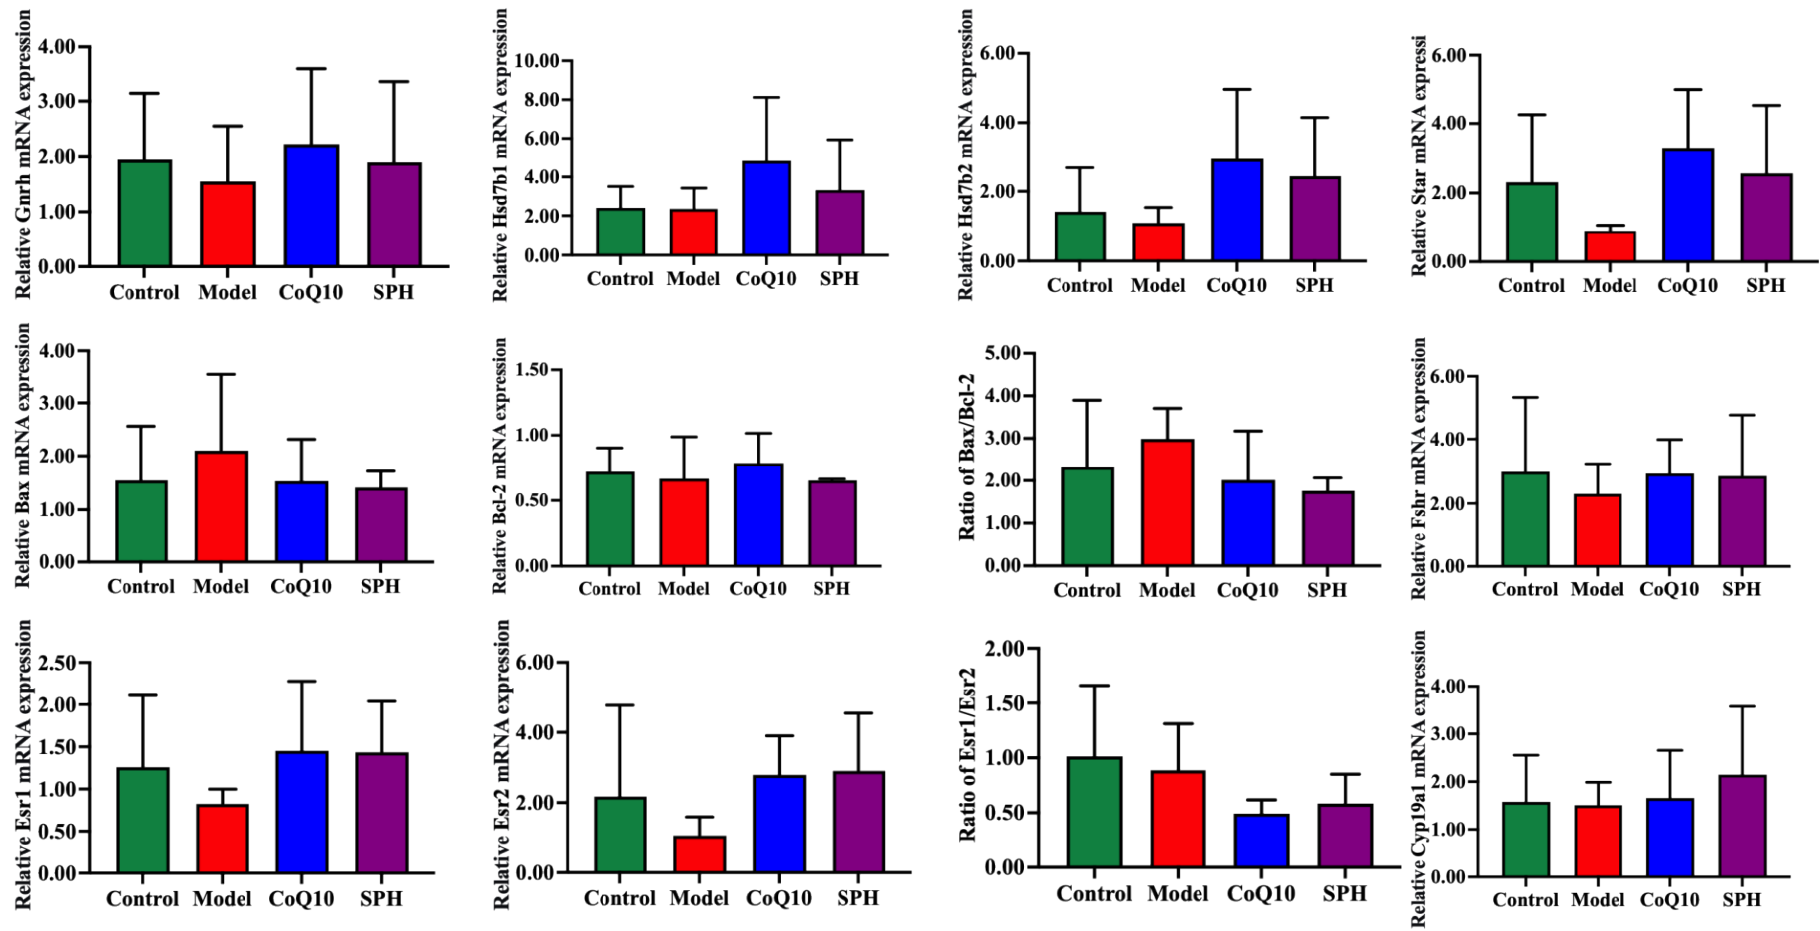

**Figure S1** Effects of SPH on selected hypothalamic-related gene expression in CTX-induced POF mice. The mRNA levels of selected hypothalamic genes, excluding *Mapk1*, were measured by qRT-PCR. Each biological replicate consisted of pooled hypothalamic tissue from three

mice; n = 3 pooled biological replicates per group. Data are presented as mean  $\pm$  SD. Most examined hypothalamic genes did not show statistically significant differences among groups under the present experimental conditions.
